# Supplementary material for: Automotive Electrification Challenges Shown by Real-World Driving Data and Lifecycle Assessment
Source: MDPI journal article supplement (doi:10.3390/su142315972), 2022-11-30
Supplement: s1 [file s1]

## Supplementary Information

Table S1. EV Consumption data used in the study and their respective sources

|                     | Model                                      | Fuel<br>[l/100<br>km] | Energy<br>[kWh/100km] | Vehicle<br>Emissions<br>[kg<br>CO <sub>2</sub> /km] | Range<br>[km]  | Registrations<br>in 2018 [1] |
|---------------------|--------------------------------------------|-----------------------|-----------------------|-----------------------------------------------------|----------------|------------------------------|
| <b>Compact-size</b> |                                            |                       |                       |                                                     |                |                              |
| BEV                 | Hyundai Ioniq<br>[2]                       |                       | 11.5                  |                                                     | 280            | 1695                         |
|                     | <b>Average<br/>value used</b>              |                       | <b>11.5</b>           |                                                     | <b>280</b>     |                              |
| PHEV                | Audi A3, S3,<br>RS3<br>[3]                 | 1.8 –<br>1.6          | 12.0 – 11.4           | 0.040 –<br>0.036                                    | 50             | 1682                         |
|                     | <b>Average<br/>value used</b>              | <b>1.7</b>            | <b>11.7</b>           | <b>0.038</b>                                        | <b>50</b>      |                              |
| <b>SUV</b>          |                                            |                       |                       |                                                     |                |                              |
| BEV                 | Mercedes-<br>Benz EQC<br>[4]               | -                     | 20.8 – 19.7           | -                                                   | 445 –<br>471   | -                            |
|                     | Tesla Model X<br>[5]                       | -                     | 22.6 – 20.8           | -                                                   |                | -                            |
|                     | <b>Average<br/>value used</b>              |                       | <b>20.9</b>           |                                                     | <b>458</b>     |                              |
| PHEV                | Mercedes-<br>Benz GLC [6]                  | 2.7 –<br>2.5          | 15.2 – 13.9           | 0.064 –<br>0.059                                    | 34             | 1459                         |
|                     | Kia Niro<br>[7]                            | 1.3                   | 10.5<br>[8]           | 0.029                                               | 58             | 1440                         |
|                     | Mitsubishi<br>Outlander<br>[9]             | 1.8                   | 14.8                  | 0.03                                                | 54             | 2193                         |
|                     | <b>Average<br/>value used</b>              | <b>1.9</b>            | <b>13.5</b>           | <b>0.043</b>                                        | <b>49.4</b>    |                              |
| FCEV                | Hyundai Nexo<br>[10]                       | 0.84*                 |                       |                                                     | 756            |                              |
|                     | <b>Average<br/>value used</b>              | 0.84*                 |                       |                                                     | 756            |                              |
| FC<br>PHEV          | Mercedes-<br>Benz GLC Fuel<br>Cell<br>[11] | 0.34*                 | 13.7                  |                                                     | 437+49<br>[12] |                              |
|                     | <b>Average<br/>value used</b>              | 0.34*                 | 13.7                  |                                                     | 486            |                              |
| <b>Mid-size</b>     |                                            |                       |                       |                                                     |                |                              |
| BEV                 | Tesla Model S<br>[5]                       | -                     | 20.0 – 18.1           |                                                     | 413<br>[13]    |                              |
|                     | <b>Average<br/>value used</b>              |                       | 19.1                  |                                                     | 413            |                              |

|      |                            |           |             |               |         |      |
|------|----------------------------|-----------|-------------|---------------|---------|------|
| PHEV | Mercedes-Benz E-Class [14] | 1.5       | -           | 0.041         |         | 1636 |
|      | Volvo 90 [15]              | 1.9       | 15.9 [16]   | 0.043         | 52 [17] | 282  |
|      | BMW 5er [18]               | 2.1 – 1.9 | 14.1 – 13.1 | 0.049 – 0.044 |         | 1888 |
|      | <b>Average value used</b>  | 1.8       | 13.9        | 0.044         | 52      |      |
|      |                            |           |             |               |         |      |
| FCEV | Toyota Mirai [19]          | 0.76*     | -           |               | 500     |      |
|      | Honda Clarity [20]         | 0.77*     | -           |               | 589     |      |
|      | <b>Average value used</b>  | 0.77*     |             |               | 544.5   |      |

---

\*in kg H<sub>2</sub>/100 km

Table S2. Estimation of CO<sub>2</sub> emissions of fuel supply for ICV

The average fuel supply in kg CO<sub>2</sub>/l was calculated by collecting LCA data from available studies. An average value from all available data was calculated and used in further calculations.

|                            | Fuel Supply<br>[kg<br>CO <sub>2</sub> /vehicle] | Lifecycle<br>Distance<br>[km/vehicle] | Fuel<br>Supply [kg<br>CO <sub>2</sub> /km] | Fuel<br>Consumption<br>[l/100km]<br>[1] | Calculated<br>Fuel<br>Supply [kg<br>CO <sub>2</sub> /l] |
|----------------------------|-------------------------------------------------|---------------------------------------|--------------------------------------------|-----------------------------------------|---------------------------------------------------------|
| <i>Petrol</i>              |                                                 |                                       |                                            |                                         |                                                         |
| Mercedes-Benz A-Class [21] | 3600                                            | 160,000                               | 0.0225                                     |                                         |                                                         |
| ADAC [22]                  | 3600                                            | 150,000                               | 0.0240                                     |                                         |                                                         |
| Volkswagen Golf [23]       |                                                 |                                       | 0.0243                                     |                                         |                                                         |
| <b>Average</b>             |                                                 |                                       | 0.0236                                     | 5.4                                     | <b>0.437</b>                                            |
| <i>Diesel</i>              |                                                 |                                       |                                            |                                         |                                                         |
| Mercedes-Benz A-Class [21] | 1600                                            |                                       | 0.0100                                     |                                         |                                                         |
| ADAC [22]                  | 3650                                            |                                       | 0.0243                                     |                                         |                                                         |
| Volkswagen Golf [23]       | -                                               | -                                     | 0.0099                                     |                                         |                                                         |
| <b>Average</b>             |                                                 |                                       |                                            | 4.2                                     | <b>0.3511</b>                                           |
| <i>Petrol</i>              |                                                 |                                       |                                            |                                         |                                                         |
| Mercedes-Benz E-Class      | 6100                                            | 250,000                               | 0.0244                                     |                                         |                                                         |
| ADAC [22]                  | 5800                                            | 150,000                               | 0.0387                                     |                                         |                                                         |
| <b>Average</b>             |                                                 |                                       | 0.0315                                     | 7.3                                     | <b>0.4320</b>                                           |
| <i>Diesel</i>              |                                                 |                                       |                                            |                                         |                                                         |
| Mercedes-Benz E-Class [24] | 2.100                                           | 250,000                               | 0.0084                                     |                                         |                                                         |
| ADAC [22]                  | 4.400                                           | 150,000                               | 0.0293                                     |                                         |                                                         |
| <b>Average</b>             |                                                 |                                       | 0.0189                                     | 5.1                                     | <b>0.3699</b>                                           |
| <i>Petrol</i>              |                                                 |                                       |                                            |                                         |                                                         |
| Mercedes-Benz S-Class      | 11.200                                          | 300,000                               | 0.0373                                     |                                         |                                                         |
| <b>Average</b>             |                                                 |                                       | 0.0373                                     | 9.2                                     | <b>0.4058</b>                                           |
|                            |                                                 |                                       |                                            | Average Petrol                          | 0.4249                                                  |
|                            |                                                 |                                       |                                            | Average Diesel                          | 0.3605                                                  |
|                            |                                                 |                                       |                                            | Average Petrol & Diesel                 | 0.3927                                                  |



|                              |                |             |                |                |         |          |                    |
|------------------------------|----------------|-------------|----------------|----------------|---------|----------|--------------------|
| Otto                         | 5700<br>[21]   | 300<br>[21] | 0.3144<br>***  | -              | 4.17*** | -        | -                  |
| Diesel                       | 6100<br>[21]   | 300<br>[21] | 0.2956<br>***  | -              | 3.72*** | -        | -                  |
| BEV                          | 10,260<br>[23] | 300<br>*    | -              | 0.0920<br>[25] | -       | 10.19*** | 280<br>(Table S.1) |
| PHEV                         | 7900 [26]      |             | 0.3144<br>***  | -              | 1.51*** | 10.37*** | 50<br>(Table S.1)  |
| <b>SUV (160,000 km)</b>      |                |             |                |                |         |          |                    |
| Otto                         | 8500*          | 500<br>*    | 0.3144<br>***  | -              | 5.31*** | -        | -                  |
| Diesel                       | 9100<br>[27]   | 500<br>[27] | 0.2956<br>***  | -              | 4.43*** | -        | -                  |
| BEV                          | 17,000*        | 500<br>*    | -              | 0.0920<br>[25] | -       | 18.59*** | 458<br>(Table S.1) |
| PHEV                         | 11,100<br>[27] | 500<br>[27] | 0.3144<br>***  | 0.0920<br>[25] | 1.67*** | 11.98*** | 50<br>(Table S.1)  |
| FCEV                         | 11,486*        | 500<br>*    | 9.9774<br>[28] | -              | 0.74*** | -        | -                  |
| FC<br>PHEV                   | 15,000<br>[27] | 500<br>*    | 9.9774<br>[28] | 0.0920<br>[25] | 0.30*** | 12.14*** | 49<br>(Table S.1)  |
| <b>Mid-size (250,000 km)</b> |                |             |                |                |         |          |                    |
| Otto                         | 7800<br>[24]   | 400<br>[24] | 0.3144<br>***  | -              | 5.31*** | --       | -                  |
| Diesel                       | 8300<br>[24]   | 400<br>[24] | 0.2956<br>***  | -              | 4.43*** | -        | -                  |
| BEV                          | 19,800<br>[26] | 400<br>*    | -              | 0.0920<br>[25] | -       | 18.59*** | 413<br>(Table S.1) |
| PHEV                         | 10,000<br>[24] | 400<br>[24] | 0.3050<br>***  | 0.0920<br>[25] | 1.67*** | 11.98*** | 52<br>(Table S.1)  |
| FCEV                         | 10,541*        | 400<br>*    | 9.9774<br>[28] | -              | 0.67*** | -        | -                  |

\*assumed the same as other vehicle types as explained in manuscript

\*\* in kg H<sub>2</sub>

\*\*\*derived from today's LCA data as explained in manuscript

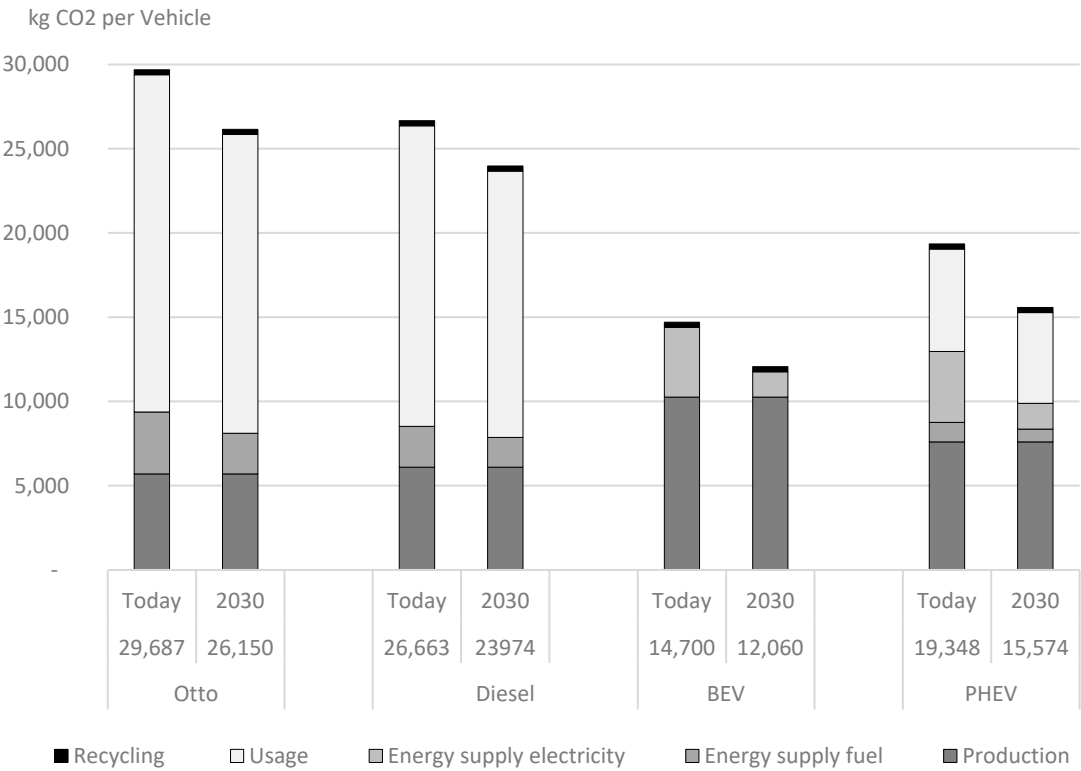

Figure S1 LCA comparison for CO2 emissions: compact segments

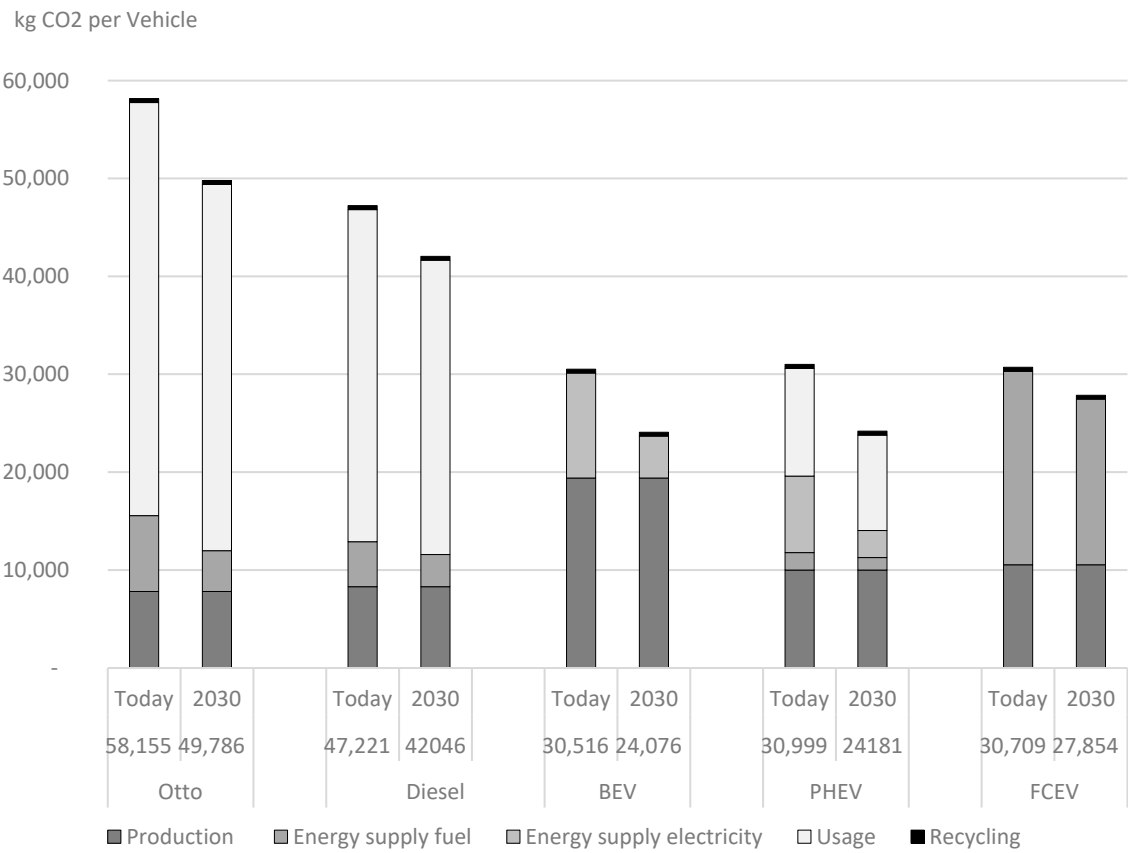

Figure S2 LCA comparison for CO2 emissions: mid-size segments

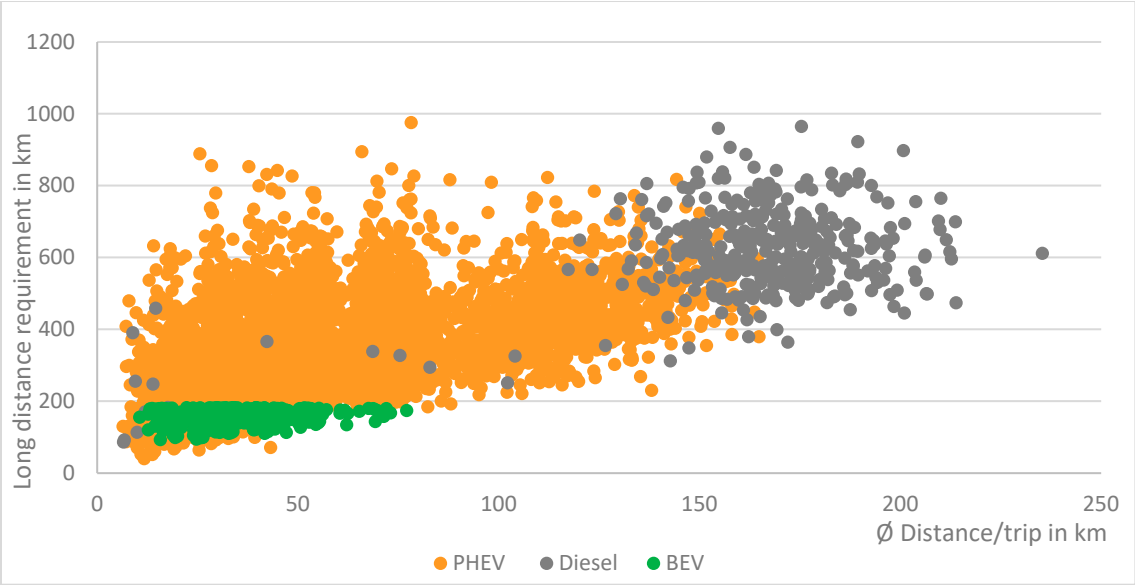

Figure S3 Environmentally optimal drivetrain type for compact segment in 2020

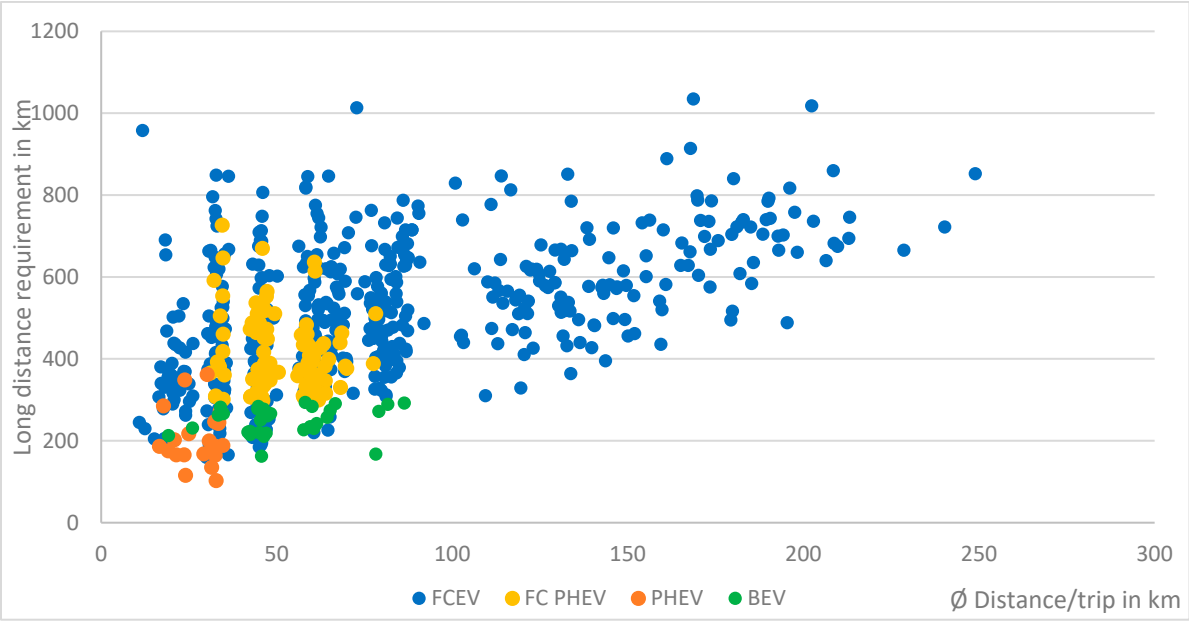

Figure S4 Environmentally optimal drivetrain type for SUV segment in 2020

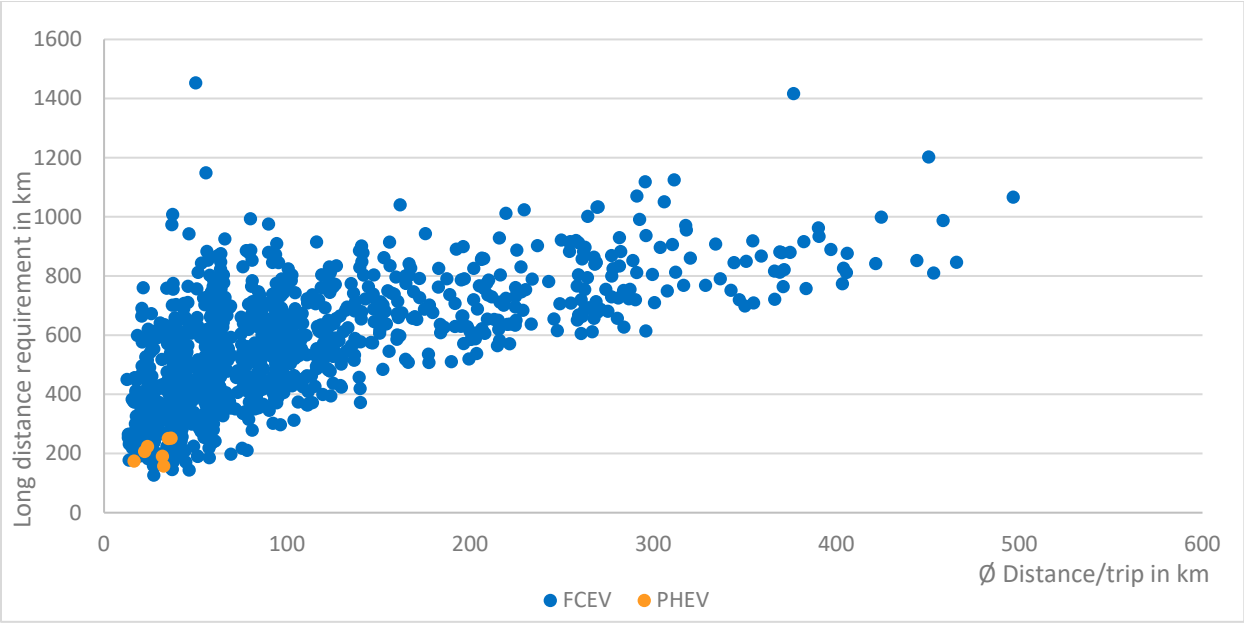

Figure S5 Environmentally optimal drivetrain type for mid-size segment in 2020

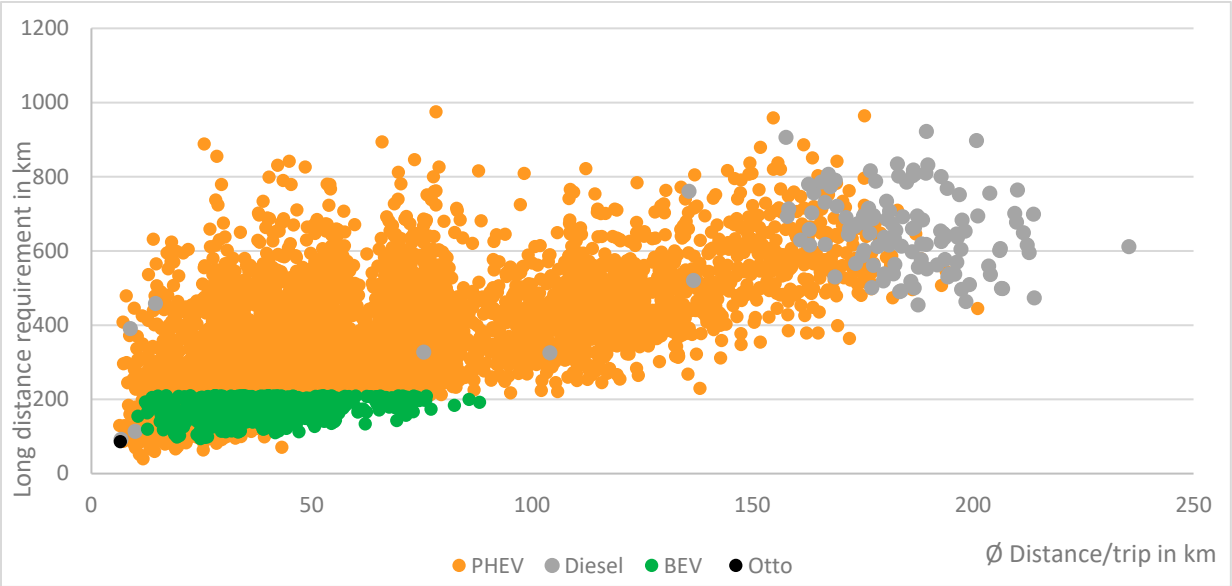

Figure S6 Environmentally optimal drivetrain type for compact segment in 2030

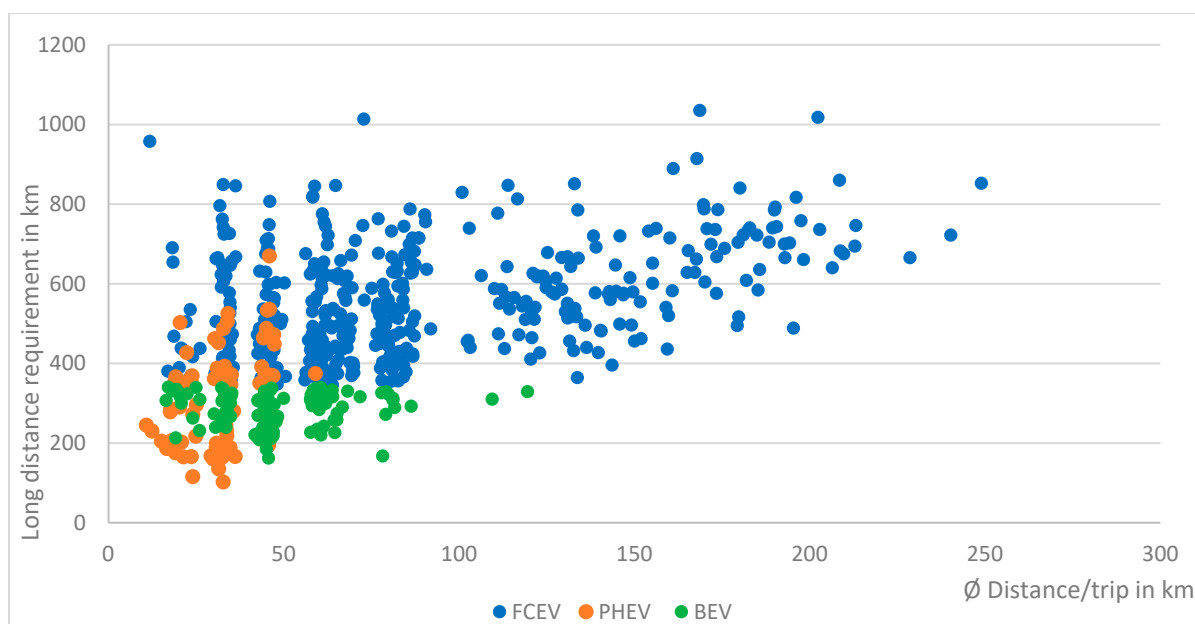

Figure S7 Environmentally optimal drivetrain type for SUV segment in 2030

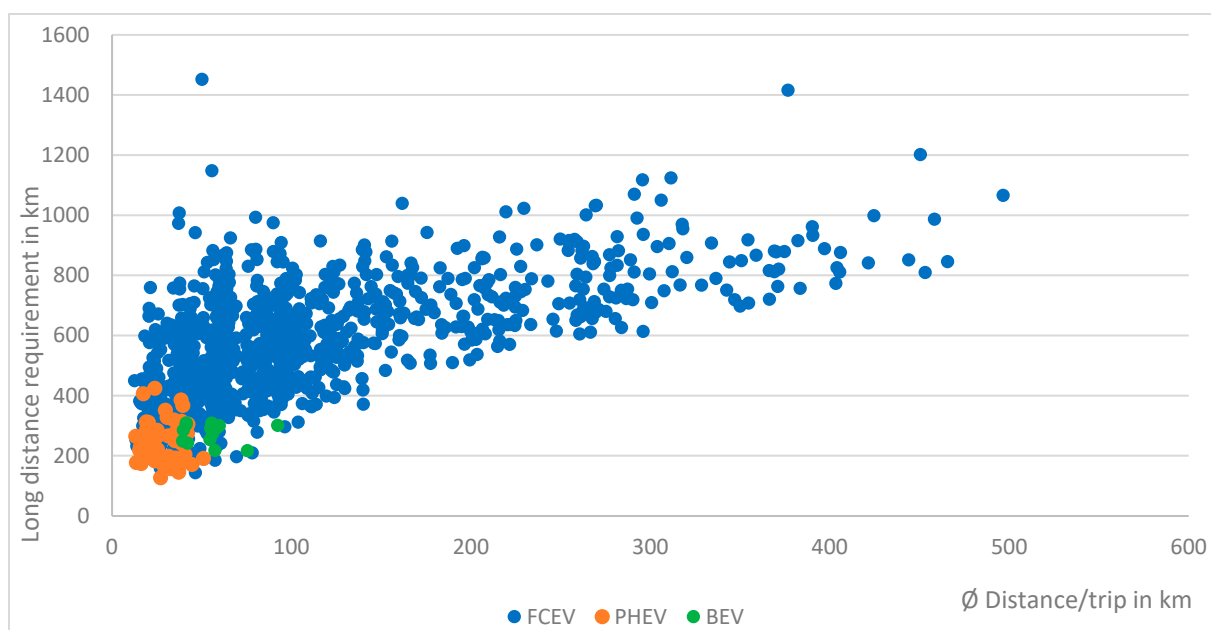

Figure S8 Environmentally optimal drivetrain type for mid-size segment in 2030

## References

1. Kraftfahrt-Bundesamt. *Fahrzeugzulassungen (FZ): Neuzulassungen von Kraftfahrzeugen nach Umwelt-Merkmalen*, Flensburg, 2018. Available online: [https://www.kba.de/SharedDocs/Downloads/DE/Statistik/Fahrzeuge/FZ14/fz14\\_2018\\_pdf.pdf;jsessionid=5331E57BF5C2F573BD1A571C098001B0.live21321?\\_\\_blob=publicationFile&v=1](https://www.kba.de/SharedDocs/Downloads/DE/Statistik/Fahrzeuge/FZ14/fz14_2018_pdf.pdf;jsessionid=5331E57BF5C2F573BD1A571C098001B0.live21321?__blob=publicationFile&v=1) (accessed on 20 September 2020).
2. Hyundai Motor Deutschland GmbH. *Hyundai Ioniq Elektro | Technische Daten*, 2018. Available online:

- [https://www1.hyundai.news/fileadmin/de/Pressemappen/Ioniq\\_Elektro/Ioniq\\_Elektro\\_2018\\_3\\_Technische\\_Daten.pdf](https://www1.hyundai.news/fileadmin/de/Pressemappen/Ioniq_Elektro/Ioniq_Elektro_2018_3_Technische_Daten.pdf) (accessed on 5 March 2020).
3. Audi AG. *Preisliste A3 | S3 | A3 Sportback | A3 Sportback g-tron | A3 Sportback e-tron | S3 Sportback*, 2017. Available online: [https://www.audi.de/dam/nemo/models/misc/pdf/my-2017/preislisten/preisliste\\_a3\\_s3\\_a3-sportback\\_a3-sportback-g-tron\\_a3-sportback-e-tron\\_s3-sportback.pdf](https://www.audi.de/dam/nemo/models/misc/pdf/my-2017/preislisten/preisliste_a3_s3_a3-sportback_a3-sportback-g-tron_a3-sportback-e-tron_s3-sportback.pdf) (accessed on 5 May 2020).
  4. EV Specifications. 2020 Mercedes-Benz EQC 400 4MATIC - Specifications and price. Available online: <https://www.evspecifications.com/en/model/c7d2a8> (accessed on 5 January 2022).
  5. Tesla Inc. European Union Energy Label. Available online: [https://www.tesla.com/en\\_EU/support/european-union-energy-label](https://www.tesla.com/en_EU/support/european-union-energy-label) (accessed on 5 January 2022).
  6. Auto Motor Sport. Mercedes GLC 350 e im Fahrbericht [Online], December 9, 2015. Available online: <https://www.auto-motor-und-sport.de/fahrbericht/mercedes-glc-350-e-fahrbericht/technische-daten/> (accessed on 5 January 2022).
  7. Ultimate Specs. Kia Niro 1.6 GDi PHEV Technical Specs, Dimensions. Available online: <https://www.ultimatespecs.com/car-specs/Kia/111441/Kia-Niro-16-GDi-PHEV.html> (accessed on 5 January 2022).
  8. Kia Corporation. Explore the range. Available online: <https://www.kia.com/eu/vehicles/kia-range/> (accessed on 5 January 2022).
  9. Motor Sport. Mitsubishi Outlander 2.4 PHEV Motion Auto 4WD. Available online: [http://motor.sport.es/tm\\_ficha.php?id=801857420180901&fecha=20180901&mercado=es&site=sport&impresion=true](http://motor.sport.es/tm_ficha.php?id=801857420180901&fecha=20180901&mercado=es&site=sport&impresion=true) (accessed on 5 January 2022).
  10. Hyundai Motor Deutschland GmbH. Der Hyundai NEXO: Presstext. Available online: <https://www.hyundai.news/de/modelle/e-modelle/nexo/pressemappe/der-hyundai-nexo-presstext.html> (accessed on 5 January 2022).
  11. Daimler AG. *360° Environmental Check: Mercedes-Benz GLC F-Cell*, 2018. Available online: <https://www.daimler.com/documents/sustainability/product/daimler-environmental-check-lifecycle-compact-glc-f-cell-en.pdf> (accessed on 25 December 2021).
  12. Daimler AG. Mercedes-Benz EQ: GLC F-CELL with EQ Power. Available online: <https://www.la.mercedes-benz.com/en/passengercars/mercedes-benz-cars/models/e-mobility/project-eq/experience-eq.pi.html/mercedes-benz-cars/models/e-mobility/project-eq/experience-eq/future-of-mobility/f-cell> (accessed on 5 January 2022).
  13. EV Compare. Tesla Model X 90D specs, price, photos, offers and incentives. Available online: [https://evcompare.io/cars/tesla/tesla\\_model\\_x\\_90d/](https://evcompare.io/cars/tesla/tesla_model_x_90d/) (accessed on 6 January 2022).
  14. Auto Data. 2018 Mercedes-Benz E-class (W213) E 300 de (306 Hp) Plug-In Hybrid G-TRONIC | Technical specs, data, fuel consumption, Dimensions. Available online: <https://www.auto-data.net/en/mercedes-benz-e-class-w213-e-300-de-306hp-plug-in-hybrid-g-tronic-35192> (accessed on 6 January 2022).
  15. International Fleet World. Road Test: Volvo S90 T8 - International Fleet World. Available online: <https://internationalfleetworld.com/road-test-volvo-s90-t8/> (accessed on 6 January 2022).
  16. AutoScout24. Volvo S90 T8 Twin Engine AWD. Available online: <https://www.autoscout24.com/offers/volvo-s90-t8-twin-engine-awd-inscription-360-standheizu-electric-gasoline-grey-55f0007e-e53f-454b-aa84->

- b622ded2dd93?source=list\_searchresults&cldtidx=16&sort=standard&lastSeenGuidPresent=false&cldtsrc=listPage (accessed on 6 January 2022).
17. White, A. The Volvo XC90 Has a Wide Range of Common and Inconvenient Problems. *MotorBiscuit.com [Online]*, April 5, 2020. Available online: <https://www.motorbiscuit.com/the-volvo-xc90-has-a-wide-range-of-common-and-inconvenient-problems/> (accessed on 6 January 2022).
  18. FichasMotor. BMW 5 Series Sedan (G30) 530e (252 Cv) Plug-in Hybrid iPerformance Steptronic | FICHA TÉCNICA ✓. *FichasMotor [Online]*, January 1, 2019. Available online: <https://fichasmotor.com/bmw/bmw-5-series-sedan-g30-530e-252-cv-plug-in-hybrid-iperformance-steptronic/> (accessed on 6 January 2022).
  19. H2.LIVE. Toyota MIRAI - H2.LIVE. Available online: <https://h2.live/en/fuelcell-cars/toyota-mirai/> (accessed on 6 January 2022).
  20. Luo, Y.; Wu, Y.; Li, B.; Mo, T.; Li, Y.; Feng, S.-P.; Qu, J.; Chu, P.K. Development and application of fuel cells in the automobile industry. *Journal of Energy Storage* **2021**, *42*, 103124, doi:10.1016/j.est.2021.103124.
  21. Daimler AG. *Umweltzertifikat Mercedes-Benz A-Klasse*, 2018. Available online: <https://www.daimler.com/dokumente/nachhaltigkeit/produkt/daimler-umweltzertifikat-mb-a-klasse.pdf> (accessed on 25 December 2021).
  22. Kroher, T. *Elektro, Gas, Benzin, Diesel & Hybrid - Die Ökobilanz unserer Autos*, 2019. Available online: <https://www.adac.de/der-adac/motorwelt/reportagen-berichte/auto-innovation/studie-oekobilanz-pkw-antriebe-2018/##> (accessed on 29 April 2019).
  23. Volkswagen AG Newsroom. *Klimabilanz von E-Fahrzeugen & Life Cycle Engineering*, 2019. Available online: [https://uploads.volkswagen-newsroom.com/system/production/uploaded\\_files/14448/file/da01b16ac9b580a3c8bc190ea2af27db4e0d4546/Klimabilanz\\_von\\_E-Fahrzeugen\\_Life\\_Cycle\\_Engineering.pdf?1556110703](https://uploads.volkswagen-newsroom.com/system/production/uploaded_files/14448/file/da01b16ac9b580a3c8bc190ea2af27db4e0d4546/Klimabilanz_von_E-Fahrzeugen_Life_Cycle_Engineering.pdf?1556110703) (accessed on 29 December 2021).
  24. Daimler AG. *Environmental Certificate Mercedes-Benz E-Class*, 2016. Available online: <https://www.daimler.com/documents/sustainability/product/daimler-environmental-certificate-mb-e-class.pdf> (accessed on 25 December 2021).
  25. BloombergNEF. New Energy Outlook 2018 - Data Viewer. Available online: <https://about.bnef.com/new-energy-outlook/> (accessed on 3 March 2019).
  26. ADAC e.V. *Ökobilanz gängiger Antriebstechniken: Konventionelle Antriebe sind lange nicht am Ende*, 2019. Available online: <https://www.adac.de/infotestrat/umwelt-und-innovation/abgas/oekobilanz/default.aspx?ComponentId=317354&SourcePagelId=47733#> (accessed on 28 June 2019).
  27. Daimler AG. *Environmental Certificate Mercedes-Benz GLC*, 2015. Available online: <https://www.daimler.com/images/sustainability/produkt/new-environmentalcertificates/daimler-umweltzertifikat-compact-mb-glc.pdf> (accessed on 25 December 2021).
  28. Sternberg, A.; Hank, C.; Hebling, C. *Treibhausgas-Emissionen für Batterie- und Brennstoffzellenfahrzeuge mit Reichweiten über 300 km*, 2019. Available online: [https://www.ise.fraunhofer.de/content/dam/ise/de/documents/news/2019/ISE\\_Ergebnisse\\_Studie\\_Treibhausgasemissionen.pdf](https://www.ise.fraunhofer.de/content/dam/ise/de/documents/news/2019/ISE_Ergebnisse_Studie_Treibhausgasemissionen.pdf) (accessed on 25 December 2021).
